# Supplementary material for: Population Structure of the Endangered Franciscana Dolphin (Pontoporia blainvillei): Reassessing Management Units
Source: PubMed Central journal article supplement (PMC3908959; doi:10.1371/journal.pone.0085633), 2014-01-31
Supplement: pone.0085633.s006.pdf [file pone.0085633.s006.pdf]

Table S2: AMOVA results of all population structure scenarios tested, considering all sampling localities, compared to scenarios proposed previously.

| Population structure hypotheses                   | $\Phi_{CT}$ | P                |
|---------------------------------------------------|-------------|------------------|
| <i>2 populations</i>                              |             |                  |
| AR+UR+RS+SC / PR+SP+RJ+ES                         | 0.13        | 0.004            |
| AR+UR+RS / SC+PR+SP+RJ+ES <sup>a</sup>            | 0.13        | 0.02             |
| AR+UR+RS+SC+PR+SP+RJS / RJN+ES                    | <b>0.44</b> | 10 <sup>-5</sup> |
| AR+UR+RS+SC+PR+SP / RJ+ES                         | 0.40        | 10 <sup>-5</sup> |
| <i>3 populations</i>                              |             |                  |
| AR+UR+RS+SC / PR+SP+RJS / RJN+ES                  | 0.31        | 10 <sup>-5</sup> |
| AR+UR+RS / SC+PR+SP+RJS / RJN+ES                  | 0.34        | 10 <sup>-5</sup> |
| AR+UR+RS+SC+PR+SP+RJS / RJN / ES                  | 0.40        | 10 <sup>-5</sup> |
| AR+UR+RS+SC+PR+SP / RJ / ES                       | 0.40        | 10 <sup>-5</sup> |
| AR+UR+RS+SC+PR+SPS+SPC / SPN+RJS / RJN+ES         | 0.41        | 10 <sup>-5</sup> |
| AR+UR+RS / SC+PR+SP+RJ / ES                       | 0.25        | 10 <sup>-5</sup> |
| <i>4 populations</i>                              |             |                  |
| AR / UR+RS / SC+PR+SP / RJ+ES <sup>b</sup>        | 0.26        | 10 <sup>-5</sup> |
| AR / UR+RS / SC+PR+SP+RJS / RJN+ES                | 0.28        | 10 <sup>-5</sup> |
| AR+UR+RS / SC+PR+SP+RJS / RJN / ES                | 0.35        | 10 <sup>-5</sup> |
| AR+UR+RS+SC / PR+SP+RJS / RJN / ES                | 0.32        | 10 <sup>-5</sup> |
| AR / UR+RS / SC+PR+SP+RJ / ES                     | 0.15        | 0.01             |
| AR / UR+RS+SC / PR+SP+RJS / RJN+ES                | 0.22        | 10 <sup>-5</sup> |
| AR+UR+RS+SC+PR+SPS+SPC / SPN+RJS / RJN / ES       | 0.40        | 10 <sup>-5</sup> |
| <i>5 populations</i>                              |             |                  |
| AR / UR+RS / SC+PR+SP+RJS / RJN / ES              | 0.29        | 10 <sup>-5</sup> |
| AR+UR / RS+SC / PR+SP+RJS / RJN / ES              | 0.27        | 10 <sup>-5</sup> |
| AR / UR+RS+SC / PR+SP+RJS / RJN / ES              | 0.23        | 10 <sup>-5</sup> |
| AR / UR+RS / SC+PR / SP+RJS / RJN+ES              | 0.23        | 10 <sup>-5</sup> |
| AR+UR+RS / SC+PR+SPS+SPC / SPN+RJS / RJN / ES     | 0.36        | 10 <sup>-5</sup> |
| AR+UR+RS / SC+PR+SPS / SPC+SPN+RJS / RJN / ES     | 0.35        | 10 <sup>-5</sup> |
| AR+UR+RS+SC / PR+SPS+SPC / SPN+RJS / RJN / ES     | 0.33        | 10 <sup>-5</sup> |
| <i>6 populations</i>                              |             |                  |
| AR / UR+RS / SC+PR / SP+RJS / RJN / ES            | 0.24        | 10 <sup>-5</sup> |
| AR+UR+RS / SC+PR / SPS+SPC / SPN+RJS / RJN / ES   | 0.34        | 10 <sup>-5</sup> |
| AR / UR+RS / SC+PR+SPS+SPC / SPN+RJS / RJN / ES   | 0.32        | 10 <sup>-5</sup> |
| AR+UR+RS / SC / PR+SPS+SPC / SPN+RJS / RJN / ES   | 0.33        | 10 <sup>-5</sup> |
| AR+UR+RS / SC+PR / SPS / SPC+SPN+RJS / RJN / ES   | 0.37        | 10 <sup>-5</sup> |
| AR / UR+RS / SC+PR+SPS / SPC+SPN+RJS / RJN / ES   | 0.30        | 10 <sup>-5</sup> |
| <i>7 populations</i>                              |             |                  |
| AR / UR+RS / SC+PR / SPS+SPC / SPN+RJS / RJN / ES | 0.28        | 10 <sup>-5</sup> |

Population structure hypotheses proposed previously:

<sup>a</sup> Pinedo (1991) and Secchi *et al.* (1998).

<sup>b</sup> Secchi *et al.* (2003). See text for explanation.
